# Supplementary material for: High-energy lithium-ion hybrid supercapacitors composed of hierarchical urchin-like WO3/C anodes and MOF-derived polyhedral hollow carbon cathodes
Source: Royal Society of Chemistry journal article supplement (doi:10.1039/c6nr05480c), 2016-01-01
Supplement: c6nr05480c1.pdf [file c6nr05480c1.pdf]

Electronic Supplementary Information (ESI)

**High-Energy Lithium-Ion Hybrid Supercapacitors Composed of Hierarchical Urchin-like WO<sub>3</sub>/C  
Anodes and MOF-derived Polyhedral Hollow Carbon Cathodes**

Juan Xu,<sup>1</sup> Yuanyuan Li,<sup>1</sup> Lei wang,<sup>1</sup> Qifa Cai,<sup>1</sup> Qingwei Li,<sup>1,3</sup> Biao Gao,<sup>2</sup> Xuming Zhang,  
<sup>2,3</sup> Kaifu Huo<sup>1,\*</sup> and Paul K Chu<sup>3</sup>

<sup>1</sup> *Wuhan National Laboratory for Optoelectronics (WNLO) School of Optical and  
Electronic Information Huazhong University of Science and Technology Wuhan  
430074, China. E-mail: [kfhuo@hust.edu.cn](mailto:kfhuo@hust.edu.cn)*

<sup>2</sup> *The State Key Laboratory of Refractories and Metallurgy, Wuhan University of  
Science and Technology, Wuhan 430081, China.*

<sup>3</sup> *Department of Physics and Materials Science, City University of Hong Kong, Tat  
Chee Avenue, Kowloon, Hong Kong, China.*

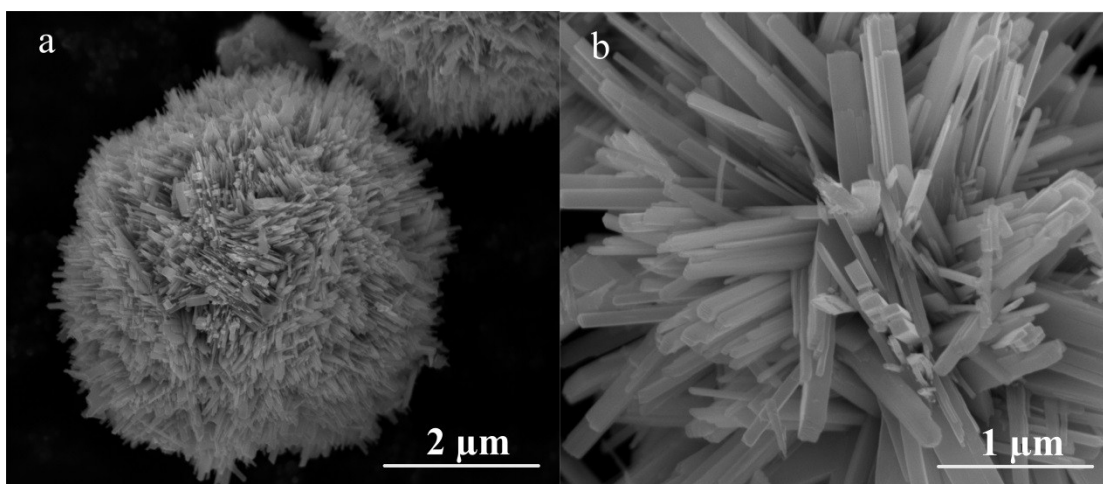

**Figure S1.** Characterization of pristine WO<sub>3</sub>: (a) The SEM of WO<sub>3</sub>, (b) The high-magnification SEM of WO<sub>3</sub> nanorod.

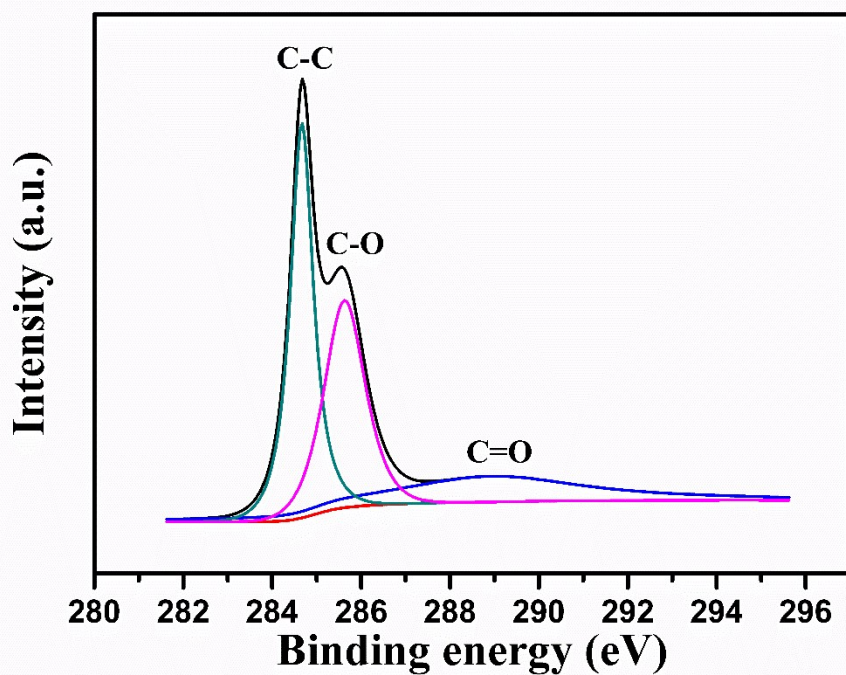

**Figure S2.** High-resolution XPS spectra of Urchin-like Carbon Coated WO<sub>3</sub> Microspheres of C1s.

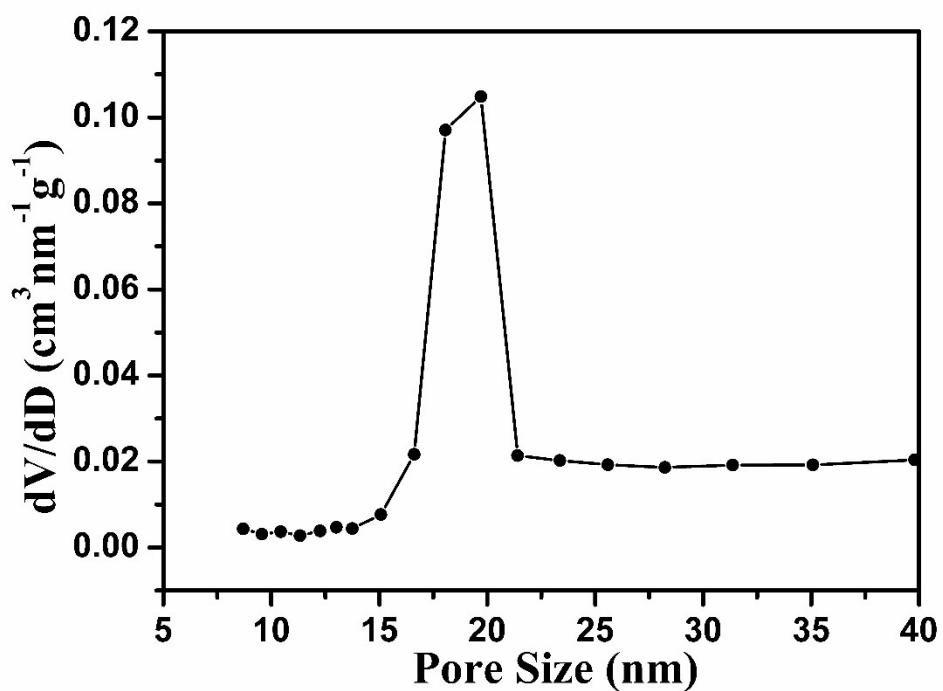

**Figure S3.** Pore size distribution plot of urchin-like  $\text{WO}_3/\text{C}$  microspheres.

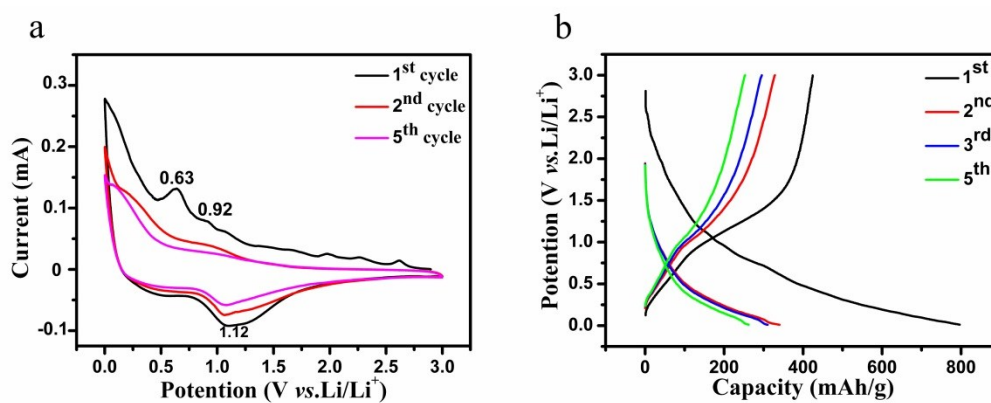

**Figure S4.** The CV curves and first five discharging-charging cycles of pristine  $\text{WO}_3//\text{Li}$  half-cells in the voltage range of 0-3.0 V vs. Li /  $\text{Li}^+$ .

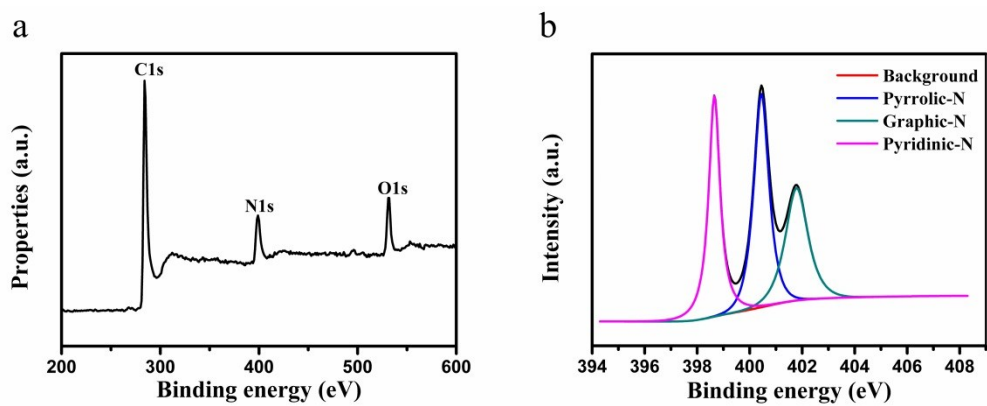

**Figure S5.** (a) High-resolution XPS spectra of MOF-NC. (b) The high-resolution N 1s spectrum can be deconvoluted into pyridinic N (398.6 eV), pyrrolic N (400.4 eV), and graphitic N (401.8 eV).
